# Supplementary material
Source: publisher figshare collection journal article supplement (https://brill.figshare.com/articles/dataset/_/25609635)
Supplement: Supplementary file 1 [file 2]

## Sheet: Suppl. Table S1. Accession #s
	Supplementary Table S1. Nematode species compared in the phylogenetic analysis and their GenBank accession numbers.
	Species	Accession number
		SSU	D2-D3 LSU
	Potensaphelenchus stammeri (outgroup 1)	AB368535	MN017236
	Bursaphelenchus abruptus (outgroup 2)	AB067756	AY508073
	Bursaphelenchus glaucae n. sp.	LC8016251
	Bursaphelenchus abietinus	AY508011	AY508074
	Bursaphelenchus acaloleptae	LC269963	AB650013
	Bursaphelenchus africanus	JF317266	HM623784
	Bursaphelenchus anamurius	FJ768949	FJ768949
	Bursaphelenchus andrassyi	KF164829	MN879888
	Bursaphelenchus antoniae	AM279709	KY498773
	Bursaphelenchus arthuroides	HQ599188	HQ599190
	Bursaphelenchus borealis	AY508012	AY508075
	Bursaphelenchus braaschae	GQ845409	GQ845408
	Bursaphelenchus burgermeisteri	JF317267	JF317269
	Bursaphelenchus carpini	LC425133 1
	Bursaphelenchus cf. poligraphi	LC425135 1
	Bursaphelenchus chengi	KT599479	EU107359
	Bursaphelenchus clavicauda	AB299221	AB299222
	Bursaphelenchus cocophilus	AY509153	AY508077
	Bursaphelenchus conicaudatus	AB067757	AB299227
	Bursaphelenchus corneolus taiwanensis	HQ407406	HQ407405
	Bursaphelenchus crenati	KU683736	KU683737
	Bursaphelenchus cryphali okhotskensis	LC425131 1
	Bursaphelenchus doui	AB299223	DQ899733
	Bursaphelenchus eggersi	AY508013	AY508078
	Bursaphelenchus eremus	MK301111	AM396568
	Bursaphelenchus eucarpus	MG840410	MG840392
	Bursaphelenchus fagi	-	JX683686
	Bursaphelenchus firmae	AB650015	AB650014
	Bursaphelenchus fraudulentus	AB067758	AY508079
	Bursaphelenchus fungivorus	AY508016	AY508082
	Bursaphelenchus geraerti	MG264562	MG264565
	Bursaphelenchus gerberae	AY508024	AY508092
	Bursaphelenchus gillanii	KJ653442	KJ653443
	Bursaphelenchus hellenicus	AY508017	AY508083
	Bursaphelenchus hibisci	LC627322 1
	Bursaphelenchus hildegardae	AM397013	AM396569
	Bursaphelenchus hirsutae	LC269966 1
	Bursaphelenchus hofmanni	AY508018	KF496910
	Bursaphelenchus hylobianum	AY508019	KT806477
	Bursaphelenchus irokophilus	MK544843	MK544842
	Bursaphelenchus kesiyae	LC087116	LC087117
	Bursaphelenchus kiyoharai NK215	AB597255	AB597256
	Bursaphelenchus koreanus	JX154585	JX154584
	Bursaphelenchus laciniatae	LC425132	LC425132
	Bursaphelenchus leoni	MN907406	MN907407
	Bursaphelenchus luxuriosae	AB097864	AB299228
	Bursaphelenchus macromucronatus	LC579929 1
	Bursaphelenchus masseyi	-	JQ287495
	Bursaphelenchus michalskii	MH815102	MH457128
	Bursaphelenchus microcarpae	LC596447 1
	Bursaphelenchus mucronatus kolymensis	AB932856	DQ364688
	Bursaphelenchus niphades	AB849465	AB849475
	Bursaphelenchus ogawanus	LC757019 1
	Bursaphelenchus okinawaensis	AB358983	AB358982
	Bursaphelenchus paraburgeri	HQ727727	HQ727726
	Bursaphelenchus paracorneolus	AY508027	AY508095
	Bursaphelenchus paraleoni	MN419334	MN419326
	Bursaphelenchus paraluxuriosae	JF966206	JF966204
	Bursaphelenchus parantoniae	KT223041	KT223042
	Bursaphelenchus paraparvispicularis	GQ421483	GQ429010
	Bursaphelenchus parapinasteri	KT878515	KT878516
	Bursaphelenchus parathailandae	JN377724	JN377722
	Bursaphelenchus parayongensis	MW367550	MW367554
	Bursaphelenchus parvispicularis	AB218829	AB368537
	Bursaphelenchus piceae	KT315781	KF772174
	Bursaphelenchus pinasteri	AM397016	AM396574
	Bursaphelenchus platzeri	AY508026	AY508094
	Bursaphelenchus poligraphi	LC425134 1
	Bursaphelenchus populi	HQ699855	FJ998281
	Bursaphelenchus posterovulvus	KF314804	KF314807
	Bursaphelenchus pterocarpi	MH820122	MH827564
	Bursaphelenchus rainulfi	LC269965	AM396575
	Bursaphelenchus ratzeburgii	MG264564	MG264569
	Bursaphelenchus rockyi	MH393459	MH396441
	Bursaphelenchus rufipennis	AB368529	AB368530
	Bursaphelenchus sakishimanus	LC027461	LC027462
	Bursaphelenchus saudi	KT806480	KT806482
	Bursaphelenchus seani	AY508029	AY508099
	Bursaphelenchus sexdentati	AY508031	AY508101
	Bursaphelenchus sinensis	AB232162	AB368538
	Bursaphelenchus singaporensis	AM397018	AM396576
	Bursaphelenchus tadamiensis	AB635399 1
	Bursaphelenchus taedae	OM976850	OM976872
	Bursaphelenchus taphrorychi	-	MF422699
	Bursaphelenchus thailandae	MK301110	DQ497184
	Bursaphelenchus tokyoensis	AB430445	AB430446
	Bursaphelenchus trypophloei	-	FJ998283
	Bursaphelenchus tusciae	AY508033	AY508104
	Bursaphelenchus ulmophilus	-	KP331049
	Bursaphelenchus vallesianus	AM397020	AM396578
	Bursaphelenchus wuae	AB918706	AB918707
	Bursaphelenchus xylophilus	AB067760	AY508107
	Bursaphelenchus yongensis	AM397023	AM396581
	Bursaphelenchus sp. 104J7	MK292121	MK292121
	Bursaphelenchus sp. 5286	MF800855	MF807217
	Bursaphelenchus sp. “FukauraB”	LC425136 1
	Bursaphelenchus sp. isolate Hyl5	MT556023	MT556020
	Bursaphelenchus sp. isolate O1	MT556021	MT556018
	Bursaphelenchus sp. isolate O117	MG865772	MG865773
	Bursaphelenchus sp. isolate O2	MT556022	MT556019
	Bursaphelenchus sp. isolate O217	MG865769	MG865770
	Bursaphelenchus sp. isolate T217	MG865767	MG865768
	Bursaphelenchus sp. isolate TV17	MG865792	MG865793
	Bursaphelenchus sp. isolate Z17	MG865787	MG865788
	Bursaphelenchus sp. JG-2011d	JN377728	JN377726
	Bursaphelenchus sp. LC-2016	KT884896	KT884895
	Bursaphelenchus sp. Ulm-04	-	MH548901
	Parasitaphelenchus costati	LC269967 1
	Parasitaphelenchus frontalis	LC383740	LC383742
	Ruehmaphelenchus ameicanus	OK668309	OK668310
	Ruehmaphelenchus asiaticus	-	AM269475
	Ruehmaphelenchus digitulus	JN377732	JN377730
	Ruehmaphelenchus formosanus	AB808718	MH590283
	Ruehmaphelenchus fujiensis	LC593613 1
	Ruehmaphelenchus juliae	LC031813 1
	Ruehmaphelenchus quercophilus	KY689022	KY689023
	Ruehmaphelenchus sp. “FukauraR”	LC425137 1
	Ruehmaphelenchus sp. NK202	AB368534	AB597984
	Ruehmaphelenchus sp. “Wakayama”	LC593614	LC593615
	Sheraphelenchus entomophagus	KC875226	KC875232
	Sheraphelenchus sucus	AB808720	AB808721
	1 Long (ca 4.2-4.6 kb) sequence including SSU, ITS and D1-D4 LSU.

## Sheet: Suppl. Table S2. Morphology
	Supplementary Table S2. Key morphological characters of corneolus subgroup of hofamanni group in the genus Bursaphelenchus.
	Species	B. glaucae n. sp.	B. corneolus corneolus		B. corneolus taiwanensis	B. moensi	B. paraparvispicularis	B. parvispicularis	B. wilfordi	B. wuae	Species		B. corneolus corneolus
												Synonym as B. curvicaudatus
	References	This study	Massey (1966), Kanzaki et al. (2016)	Wang et al. (2005)	Braasch et al. (2012)	Wang et al. (2018)	Gu et al. (2010)	Kanzaki & Futai (2005)	Massey (1964), Kanzaki et al. (2016)	Huang & Ye (2006), Gu et al. (2014), Kanzaki et al. (2014)	References	Wang et al. (2005)	Massey (1966), Kanzaki et al. (2016)
	Lateral lines	3	3	3	3	3	3	3	?	3	Lateral lines	3	3
	Relative position of S-E pore	anterior half of metacorpus	0.5-2 metacorpal length posterior to metacorpus	1.0-1.5 body diam. posterior to median bulb	ca 20 µm posterior to median bulb	at the base of or slightly posterior to nerve ring	nerve ring level or more posteriorly	nerve ring level or more posteriorly	?	posterior to metacorpus; at the level of or posterior to nerve ring	Relative position of S-E pore	1-1.5 body diam. posterior to median bulb	0.5-2 metacorpal length posterior to metacorpus
	Spicule condylus	distinct, rounded	narrow, squared, weakly truncate	narrow, squared, weakly truncate	narrow, squared, weakly truncate	high and broad with squared, rounded or pointed end	rounded-squared	short, narrow, rounded-squared, weakly truncate-straight	short, squared, truncate	short, narrow, rounded-squared, weakly truncate-straight	Spicule condylus	narrow, squared, weakly truncate	narrow, squared, weakly truncate
	Spicule rostrum	flattened trapezoid	triangular, bluntly pointed	triangular, bluntly pointed	triangular, bluntly pointed	triangular or conical with bluntly rounded tip	triangular, bluntly pointed-narrowly rounded	triangular, bluntly pointed-narrowly rounded	triangular, narrowly rounded	triangular, bluntly pointed-narrowly rounded	Spicule rostrum	triangular, bluntly pointed	triangular, bluntly pointed
	Spicule blade	triangular-half circle	triangular-half circle	triangular-half circle	triangular-half circle	stout, curved, smoothly tapered	short, stout, curved, smoothly tapered	short, very stout, curved, smoothly tapered	short, very stout, curved, smoothly tapered	short, very stout, curved, smoothly tapered	Spicule blade	triangular-half circle	triangular-half circle
	Spicule cucullus	small, flattened	small, flattened	small, flattened	small, flattened	absent	absent	absent	absent?	absent	Spicule cucullus	small, flattened	small, flattened
	Bursal flap shape	centrally concave; both sides pointed	?	oval with or without central cancavature	square-irregular, with or without central cancavature	narrow, oblong to irregular	small, bluntly pointed or irregular	centrally concave; both sides pointed	rounded	small, triangular-roundish square	Bursal flap shape	oval with or without central cancavature	?
	Female tail shape	elongate conoid	elongate conoid	elongate conoid	elongate conoid	conoid	conoid	elongate conoid	broad	elongate conoid	Female tail shape	elongate conoid	elongate conoid
	Female tail curvature	strong	moderate	strong	moderate	moderate-weak	weak	moderate-strong	straight	weak	Female tail curvature	strong	moderate
	Female tail tip	narrowly rounded-digitate	narrowly rounded	narrwoly rounded	finely rounded or pointed	finely pointed or mucronate	bluntly pointed or irregular, sometimes forming a small, blunt mucron	rounded or irregular	bluntly pointed	bluntly pointed	Female tail tip	narrowly rounded	narrowly rounded

## Sheet: Suppl. Table S3. Male
	Supplementary Table S3. Key morphometric values of males of corneolus subgroup of hofamanni group in the genus Bursaphelenchus.
	Species	B. glaucae n. sp.	B. corneolus corneolus			B. corneolus taiwanensis	B. moensi	B. paraparvispicularis	B. parvispicularis	B. wilfordi		B. wuae			Species
			Original	Redescription	Synonym as B. curvicaudatus					Original	Redescription	Original (glycerin mount)	Synonym as B. yuyaoensis	Synonym as B. osumiana (Ap5 population)
	References	This study	Massey (1966), Kanzaki et al. (2016)		Wang et al. (2005)	Braasch et al. (2012)	Wang et al. (2018)	Gu et al. (2010)	Kanzaki & Futai (2005)	Massey (1964), Kanzaki et al. (2016)		Huang & Ye (2006)	Gu et al. (2014)	Kanzaki et al. (2014)	References
	n	9	?	-	20	15	15	15	21	6	8	7	4	9	n
	L	615 (549-692)	570-700	-	750 (663-831)	647 (597-672)	685 (622-749)	690 (598-751)	764 (600-870)	670-750	693 (550-760)	861 (787-953)	749 (662-852)	1049 (957-1104)	L
	a	29.2 (28.3-30.6)	35	-	35.0 (31.5-40.2)	35.8 (31.0-42.5)	34.6 (31.0-38.8)	26.7 (22.9-30.6)	37.6 (31.4-45.3)	61	52.7 (38.8-65.7)	45.8 (44-47.5)	43.7 (40.5-47.1)	48.0 (42.0-52.4)	a
	b	8.3 (7.5-9.2)	10.5	-	9.2 (8.0-10.4)	9.7 (8.6-10.4)	9.9 (8.8-10.6)	9.0 (8.1-10.5)	10.1 (8.6-11.6)	10	10.3 (9.3-12.3)	9.0 (8.2-9.8)	8.8 (8.2-9.4)	13.1 (12.1-14.1)	b
	c	17.4 (16.3-18.6)	18.5	-	19.2 (16.7-22.9)	18.7 (17.6-19.9)	21.1 (18.7-23.0)	22.5 (18.8-26.6)	24.3 (20.0-28.4)	26	27.1 (23.9-29.6)	27.2 (24.4-29.8)	21.1 (18.8-23.4)	24.9 (20.7-27.9)	c
	c'	2.7 (2.5-2.9)	2.7	-	2.5*	2.5 (2.3-2.6)	2.7 (2.4-3.1)	2.5 (2.0-3.0)	2.5 (2.2-2.8)	1.9	2.3 (1.9-2.7)	2.5 (2.2-2.8)	2.7 (2.4-2.9)	2.8 (2.4-3.0)	c'
	T	55 (46.0-65.7)	71.6	-	60.1*	66.5 (62.8-73.3)	64.6 (50.6-72.6)	72.9 (61.2-80.2)	57.0 (50.0-66.2)	n/a	58.7 (39.2-78.4)	631	58.6 (51.2-65.0)	60.7 (55.9-64.5)	T
	Max BD	21 (19-24)	34	-	n/a	18.2 (15.7-21.3)	19.7 (18.5-20.9)	19.6 (19.6-30.1)	22 (17-24)	n/a	13.5 (11.0-17.0)	281	17.5 (16.2-20.2)	22.0 (18.5-23.0)	Max BD
	Stylet length	15.5 (14.8-16.3)	n/a	-	15.5 (13.9-16.5)	13.0 (12.2-14.2)	14.0 (13.0-14.9)	14.5 (13.7-15.4)	14 (13-15)	9.5	10.5 (10.0-11.0)	15.8 (15.0-16.8)	14.4 (14.2-14.7)	15.7 (14.6-16.4)	Stylet length
	S-E pore	58 (52-64)	123	-	90*	81 (71-85)	75 (71-83)	82 (73-88)	1021	n/a	n/a	971	96 (90-106)	107 (102-114)	S-E pore
	S-E pore from anterior end of MB	5.4 (0.5-13.3)	30	-	30*	ca 20 from posterior end	391	271	421	n/a	n/a	381	271	321,2	S-E pore from anterior end of MB
	Hemizonid	92 (86-100)	125	-	n/a	n/a	84 (78-95)	751	1131	n/a	n/a	n/a	104 (97-113)	116 (108-121)	Hemizonid
	Testis length	339 (297-401)	632	-	580*	429 (401-476)	442 (341-515)	527 (450-665)	436 (316-526)	n/a	383 (298-494)	6401	449 (359-520)	637 (576-676)	Testis length
	Cloacal BD	13.3 (12.0-14.4)	21	-	16, 17, 18*	13.9 (12.5-15.2)	12.2 (11.8-12.5)	12.9 (11.2-14.2)	13 (11-14)	13.5	11.0 (10.0-13.0)	14, 16, 171	13.4 (12.0-16.8)	14.9 (14.6-15.8)	Cloacal BD
	Tail length	35 (32-37)	55	-	42*	35 (33-38)	33 (30-39)	30 (27-34)	32 (28-37)	26	26 (23-28)	32 (28-33)	35.9 (34.2-37.0)	42 (35-46)	Tail length
	Spicule in chord	11.4 (10.6-12.3)	16-17	-	18.9 (16.5-21.6)	15.0 (14.2-16.4)	14.0 (13.0-15.5)	14 (12.6-15.3)	-	11.0	11.0 (10.0-12.0)	15.8 (14.7-16.6)	12.3 (11.4-14.7)	13.2 (13.2-16.5)	Spicule in chord
	Spicule in curve	-	16-17	-	11, 12, 14, 14*	12.6 (11.6-14.2)	13.0 (12.0-14.7)	11.6 (10.2-13.8)	13 (13-15)	9.0	6.5 (5.5-7.5)	n/a	10.0 (8.9-11.4)	12.7 (11.8-15.0)	Spicule in curve

## Sheet: Suppl. Table S4. Female
	Supplementary Table S4. Key morphometric values of females of corneolus subgroup of hofamanni group in the genus Bursaphelenchus.
	Species	B. glaucae n. sp.	B. corneolus corneolus			B. corneolus taiwanensis	B. moensi	B. paraparvispicularis	B. parvispicularis	B. wilfordi		B. wuae			Species
			Original	Redescription	Synonym as B. curvicaudatus					Original	Redescription	Original (glycerin mount)	Synonym as B. yuyaoensis	Synonym as B. osumiana (Ap5 population)
	References	This study	Massey (1966), Kanzaki et al. (2016)		Wang et al. (2005)	Braasch et al. (2012)	Wang et al. (2018)	Gu et al. (2010)	Kanzaki & Futai (2005)	Massey (1964), Kanzaki et al. (2016)		Huang & Ye (2006)	Gu et al. (2014)	Kanzaki et al. (2014)	References
	n	10	?	3	20	15	15	15	21	2	1	10	9	10	n
	L	687 (598-790)	650-700	990, 960, 850	894 (767-960)	680 (538-756)	744 (652-885)	703 (542-790)	894 (711-1012)	900	720	902 (831-1014)	835 (760-925)	1135 (1040-1274)	L
	a	29.5 (25.1-34.0)	29	n/a, 30.0, n/a	35.4 (30.2-45.1)	31.5 (27.3-34.2)	34.9 (30.3-38.2)	26.5 (21.7-31.3)	33.4 (29.7-37.1)	60	55.4	45.9 (42.9-48.3)	36.2 (35.0-37.3)	47.0 (44.1-51.9)	a
	b	9.0 (8.0-10.0)	10.5	12.8, n/a, n/a	11.2 (10.1-12.6)	9.9 (8.0-11.1)	10.7 (9.5-11.8)	9.5 (7.6-10.5)	11.4 (9.6-13.1)	15	12.4	10.1 (9.2-11.5)	8.8 (8.4-9.3)	13.9 (12.7-15.4)	b
	c	12.5 (11.0-14.3)	18.5	21.1, 22.3, 21.3	17.2 (15.0-20.2)	16.5 (13.6-19.2)	19.6 (16.4-21.6)	20.1 (16.7-23.5)	16.7 (14.8-19.0)	27	30.0	19.7 (17.8-21.5)	15.7 (14.9-16.5)	19.2 (17.1-21.8)	c
	c'	5.0 (4.4-5.9)	4	3.9, 3.9, 3.3	5.3, 6.4*	3.9 (3.3-4.3)	3.5 (3.0-3.9)	2.8 (2.4-3.2)	4.4 (3.9-5.1)	3.0	3.2	4.1 (3.7-4.4)	4.4 (4.3-4.6)	4.3 (4.0-5.0)	c'
	V	71.9 (71.1-72.8)	73	69.7, 72.5, 72.0	71.9 (69.7-74.8)	71.6 (69.2-78.9)	72.5 (71.0-73.4)	73.4 (67.5-75.1)	71.8 (70.6-73.2)	70	76.7	73.3 (72.6-73.8)	71.4 (70.4-71.9)	72.2 (71.0-72.9)	V
	Max BD	24 (18-30)	34	n/a, 32, n/a	n/a	21.5 (19.7-24.4)	21.5 (20.4-23.0)	27 (19-33)	27 (22-31)	n/a	13.0	301	24.1 (21.0-26.8)	21.5 (21.5-27.0)	Max BD
	Stylet length	15.3 (14.8-15.8)	11.0	15.0, 14.0, n/a	15.1 (13.9-17.4)	13.4 (12.1-14.3)	14.9 (14.1-16.6)	14.4 (13.6-15.0)	14 (13-15)	9.5	9.0	16.1 (15.3-17.5)	15.3 (15.0-15.8)	16.2 (15.2-17.5)	Stylet length
	S-E pore	57 (52-66)	123	n/a, 86, n/a	90*	82 (78-86)	74 (70-78)	82 (75-93)	1021	n/a	n/a	971	98 (92-107)	113 (100-135)	S-E pore
	S-E pore from anterior end of MB	3.0 (0-11.8)	30	n/a, 6.0, n/a	30*	ca 20 from posterior end	39, 35, 331	271	421	n/a	n/a	381	271	321	S-E pore from anterior end of MB
	Hemizonid	94 (88-107)	125	n/a, 96, n/a	n/a	n/a	88 (83-92)	751	1131	n/a	n/a	n/a	105 (97-114)	112 (111-146)	Hemizonid
	Ovary length	232 (203-291)	405	370, 330, 390	209*	285 (222-372)	285 (219-362)	319 (201-399)	265 (193-351)	n/a	295	3821	251 (221-300)	466 (338-682)	Ovary length
	Anal BD	11.1 (10.2-12.3)	13.5	12.0, 11.0, 12.0	10, 13*	10.8 (7.6-11.4)	10.9 (10.5-11.4)	12.6 (10.3-14.0)	12 (10-13)	10.0	7.5	12, 14, 151	12.2 (12.0-12.8)	13.9 (12.3-15.2)	Anal BD
	Tail length	55 (48-63)	55	47, 43, 40	64, 71*	41 (37-47)	38 (34-41)	39 (29-41)	54 (47-61)	30	24	45 (39-52)	53.7 (51.0-56.0)	60 (51-68)	Tail length
	PUS	64 (52-81)	148	152, 160, 144	126*	106 (75-130)	95 (68-121)	85 (69-98)	107 (56-130)	136	110	119 (103-135)	99 (90-108)	150 (122-165)	PUS
	PUS to V-A in %	46.6 (33.6-50.9)	69.9	60.1, 72.4, 72.7	61*	72.1 (48.9-88.5)	58.1 (47.3-63.8)	57 (46-65)	54.1 (27.3-64.2)	88.3	76.4	40-67	52.3 (48.9-53.6)	59 (49-67)	PUS to V-A in %
